### Highlights:

- In Switzerland, incidence of childhood cancer increased by 18% from 1985-2014.
- Increase in incidence was mainly caused by brain tumours and leukaemias.
- Improved registration and diagnostics may have increased brain tumour incidence.
- Increasing trend for leukaemias may be real, but reasons remain elusive.

PRE-PRINT

1 **FULL TITLE: Temporal trends in incidence of childhood cancer in**  
2 **Switzerland, 1985-2014**

3 Grit Sommer<sup>a,b\*</sup>, Matthias Schindler<sup>a\*</sup>, Shelagh Redmond<sup>a</sup>, Verena Pfeiffer<sup>a</sup>, Garyfallos  
4 Konstantinoudis<sup>a</sup>, Roland A. Ammann<sup>c</sup>, Marc Ansari<sup>d</sup>, Heinz Hengartner<sup>e</sup>, Gisela  
5 Michel<sup>f</sup>, Claudia E. Kuehni<sup>a,c</sup> for the Swiss Paediatric Oncology Group (SPOG)<sup>‡</sup>

6 <sup>a</sup> Swiss Childhood Cancer Registry, Institute of Social and Preventive Medicine,  
7 University of Bern, Mittelstrasse 43, 3012 Bern, Switzerland,  
8 matthias.schindler@ispm.unibe.ch, grit.sommer@ispm.unibe.ch,  
9 shelagh.redmond@ispm.unibe.ch, verena.pfeiffer@ispm.unibe.ch,  
10 garyfallos.konstantinoudis@ispm.unibe.ch, claudia.kuehni@ispm.unibe.ch

11 <sup>b</sup> Division of Paediatric Endocrinology, Diabetology and Metabolism, Inselspital, Bern  
12 University Hospital, University of Bern, Freiburgstrasse, 3010 Bern, Switzerland,  
13 grit.sommer@dbmr.unibe.ch

14 <sup>c</sup> Division of Paediatric Haematology/Oncology, Inselspital, Bern University Hospital,  
15 University of Bern, Freiburgstrasse, 3010 Bern, Switzerland, roland.ammann@insel.ch

16 <sup>d</sup> Oncology and Haematology Unit, Department of Paediatrics, Geneva University  
17 Hospital, Rue Willy-Donzé 6, CH-1205 Genève, Switzerland, marc.ansari@hcuge.ch

18 <sup>e</sup> Department of Haematology/Oncology, Children's Hospital Eastern Switzerland,  
19 Claudiusstrasse 6, 9006 St. Gallen, Switzerland, heinz.hengartner@kispisg.ch

20 <sup>f</sup> Department of Health Sciences and Health Policy, University of Lucerne, Lucerne,  
21 Switzerland, gisela.michel@unilu.ch

22 \* These authors contributed equally to this work.

23 <sup>‡</sup> **Swiss Paediatric Oncology Group (SPOG)** Scientific Committee: R A Ammann (Bern),  
24 M Ansari (Geneva), M Beck Popovic (Lausanne), E Bergstraesser (Zurich), P Brazzola  
25 (Bellinzona), J Greiner (St. Gallen), M Grotzer (Zurich), H Hengartner (St Gallen),  
26 T Kuehne (Basel), C E Kuehni (Bern), J Roessler (Bern), F Niggli (Zurich), F Schilling  
27 (Lucerne), K Scheinemann (Aarau), N von der Weid (Basel).

28 **Corresponding author:** Prof. Dr. med. Claudia E. Kuehni, University of Bern, Institute of  
29 Social and Preventive Medicine, Mittelstrasse 43, 3012 Bern, Switzerland. E-Mail:  
30 claudia.kuehni@ispm.unibe.ch, Tel: +41 31 631 35 07  
31

## 1    **STRUCTURED ABSTRACT**

2    **Background:** Incidence of childhood cancer increased in most countries worldwide, but  
3    the reasons are unclear. This study investigates trends in childhood cancer incidence in  
4    Switzerland from 1985 to 2014.

5    **Methods:** We extracted data on all childhood cancer cases diagnosed at ages 0-14  
6    years in Switzerland from the Swiss Childhood Cancer Registry. We included ICC3-3  
7    main groups I-XII and calculated age-standardised, cumulative, and age-specific  
8    incidence for different diagnostic groups. We analysed trends in annual age-  
9    standardised incidence using JoinPoint regression models.

10    **Results:** Over the study period from 1985-2014, 5104 of 5486 cancer diagnoses (93%)  
11    were microscopically verified. The proportion of children treated in paediatric cancer  
12    centres increased from 84% during 1985-1994 to 93% in 1995-2004 and 98% in 2005-  
13    2014 ( $p < 0.001$ ). Using the 2010 European standard population, age-standardised  
14    incidence was 143 in 1985-1994, 154 in 1995-2004, and 162 per million in 2005-2014.  
15    Over the period 1985-2014, incidence for all cancers increased by 0.7% (95%  
16    confidence interval [CI] 0.5-1.0) per year, 0.8% (95% CI 0.2%-1.4%) for leukaemias,  
17    3.8% (95% CI 1.7%-6.0%) for epithelial neoplasms and melanomas, and 3.0% (95% CI  
18    1.3%-4.6%) for CNS tumours for the period 1985-2002.

19    **Conclusion:** Trends in incidence were driven mostly by increases among leukaemias  
20    and CNS tumours. For CNS tumours, observed trends may be explained at least  
21    partially by diagnostic changes and improved registration. For leukaemias, rising  
22    incidence may be real and at least partly due to changes in risk factors.

## 1 **MAIN TEXT**

### 2 **Introduction**

3 Incidence of childhood cancer during the decade 2001-2010 increased worldwide by  
4 13% compared to rates in the 1980s.<sup>1</sup> The reasons for this increase remain unclear.  
5 Improved case ascertainment and diagnostics could account for this trend,<sup>2,3</sup> or the  
6 trend could represent a real increase in cancer risks.<sup>4-8</sup> Most countries have seen  
7 increasing trends in childhood cancers, though results vary by reporting period and  
8 cancer type.<sup>2,8-20</sup> Switzerland is one of the few countries with a national childhood  
9 cancer registry that has been in existence for over 40 years.<sup>21</sup> However, registry data  
10 on incidence of childhood cancer have only been published for the diagnostic period  
11 1995-2005.<sup>22,23</sup> Trends in the incidence of childhood cancer over the whole period  
12 have not yet been analysed.

13 This study is the first to assess long-term trends in incidence of childhood cancer in  
14 Switzerland. The two major aims are to calculate age-standardised, age-specific, and  
15 cumulative incidence for three diagnostic periods—1985-1994, 1995-2004, and 2005-  
16 2014—and to describe trends in age-standardised incidence over the entire period  
17 from 1985 to 2014. We also assessed indices of quality of registered cases in the SCCR.

### 18 **Methods**

#### 19 **Study population and procedure**

20 The Swiss Childhood Cancer Registry (SCCR) was founded by the Swiss Paediatric  
21 Oncology Group (SPOG) in 1976 and initially registered patients included in clinical  
22 trials.<sup>21</sup> Beginning in 1981, all patients treated in paediatric cancer centres were  
23 systematically included. In a retrospective study covering the period 1990-2004, we

1 discovered, however, that 16% of children with cancer had not been treated in  
2 paediatric cancer centres, including infants who were diagnosed only at autopsy in  
3 neonatal departments.<sup>24</sup>

4 Between 2004 and 2007, the SCCR was reorganized according to international  
5 recommendations,<sup>25,26</sup> and the review of diagnoses using pathology reports, quality  
6 indices, and retrospective inclusion of missed cases were introduced. Since then, the  
7 SCCR improved case completeness by comparing datasets with the population-based  
8 cancer registries of each Swiss canton, and by finding missed cases in mortality  
9 statistics.<sup>27</sup> The SCCR includes >95% of all childhood cancer cases diagnosed in  
10 Switzerland since 1995.

11 A clinical research coordinator in each paediatric cancer centre notifies the SCCR of  
12 new cases within two months of diagnosis. Children diagnosed with cancer before they  
13 reach the age of 16 years and older adolescents diagnosed with typical paediatric  
14 tumours are usually treated in paediatric cancer centres in Aarau, Basel, Bellinzona,  
15 Bern, Geneva, Lausanne, Lucerne, St. Gallen, and Zurich.

16 For this study, we included all children with Swiss residency at diagnosis who were  
17 registered in the SCCR and diagnosed with cancer according to one of the 12 main  
18 diagnostic groups of the ICC-3 at ages 0-14 years between 1 January 1985 and 31  
19 December 2014.

## 1 **Measurements**

2 The SCCR registers patients with leukaemias and lymphomas, malignant and benign  
3 CNS tumours, malignant solid tumours, and Langerhans cell histiocytosis who were  
4 diagnosed at ages under 21 years in Switzerland. The registry records personal  
5 information including name, sex, date of birth, address, nationality; diagnostic  
6 information including exact diagnosis and its date, basis of diagnosis, site and grade of  
7 primary and subsequent tumour(s), histological type and grade, immunophenotype  
8 and genetics, stage at diagnosis, laterality, and site of any metastasis; and treatment  
9 information that includes the name and type of treating institution, treatment type,  
10 study type, and study protocol name. Diagnoses are classified according to the  
11 International Classification of Diseases, tenth revision (ICD-10); topography and  
12 morphology of the ICD for Oncology, third revision (ICD-O-3); and the International  
13 Classification of Childhood Cancer, third edition (ICCC-3).<sup>25,28,29</sup> The study was covered  
14 by the Ethics Committee of the Canton of Bern approval to the SCCR (KEK-BE:  
15 166/2014).

## 16 **Statistical methods**

17 We calculated incidence rates based on population data from the Swiss Federal  
18 Statistical Office.<sup>30</sup> To assess indices of quality, we identified cancers treated in  
19 paediatric cancer centres and cancers that had microscopically verified diagnoses that  
20 were confirmed from histology of a primary tumour, haematological examination of  
21 peripheral blood or bone marrow, or histology of metastasis. We then calculated the  
22 average number of cases diagnosed per year and the proportional distribution of ICC-  
23 3 main groups during the three decades 1985-1994, 1995-2004, and 2005-2014. We  
24 calculated incidence rates (IR) for ICC-3 main groups and subgroups per decade

1 expressed per million children,<sup>25</sup> with direct standardization for age using the 2010  
2 European standard population.<sup>31</sup> We calculated cumulative IR, defined as the sum of  
3 age-specific IR over each year of age from 0 to 14 years and the risk of being diagnosed  
4 with cancer before the age of 15 (1 divided by the cumulative IR). We also computed  
5 age-specific IRs for the age groups <1, 1-4, 5-9, and 10-14 years. The 95% confidence  
6 intervals (95% CI) for the IR were calculated assuming Poisson distribution. We used R  
7 version 3.2.2 for data preparation, descriptive statistics, and calculation of IRs.  
8 We examined trends in annual age-standardised incidence ratios from 1985 to 2014  
9 for all diagnostic groups combined, separately for boys and girls, and for main  
10 diagnostic groups using JoinPoint, Version 4.0.2.2, assessing the magnitude and  
11 direction of trends over time and quantifying the average annual percentage change  
12 (AAPC).<sup>11,13,16,19,32-35</sup> JoinPoint fitted straight regression lines through the data, with the  
13 natural logarithm of age-standardised incidence rates as dependent variable and  
14 calendar year (1985-2014) as independent variable. We used a maximum of two  
15 joinpoints to detect a maximum of three different trends, with a minimum of three  
16 years between joinpoints. We selected the trend lines that provided the best fit to  
17 observed age-standardised incidence rates based on the ratio of the sums of squared  
18 errors from the null model and the alternative model. Inference is conducted through  
19 Monte Carlo permutation tests as implemented in the software.<sup>33</sup>  
20 The study population included 98 patients (2%) who were registered from death  
21 certificate notifications. We had no information on ICC3 main group for 12 of these  
22 and lacked dates of diagnosis for 75. We classified patients with missing diagnoses as  
23 having had other malignant neoplasms and imputed dates of diagnosis with the  
24 missforest package for R.<sup>36</sup> To generate the missing values we used observed data for  
25 year of birth, sex, cancer diagnosis, and age at death in the imputation model. We

- 1 excluded the 98 cases from all analyses using the specific subgroups of ICC3-3 cancer
- 2 diagnoses (Supplemental Table 1).

### 3 **Results**

4 In 2014 Switzerland had a population of 7.825 million inhabitants, of which 1.225  
5 million were 14 years old or younger. From 1985-2014, the SCCR registered 5486  
6 cancer cases in children aged 0-14 years living in Switzerland (Supplemental Figure 1).  
7 Of those, 5104 (93%) were microscopically verified (Table 1). The proportion of verified  
8 cases of leukaemias has remained at 100% since 1995. Microscopic verification of  
9 cancer was highest in 1995-2004 and then decreased again in 2005-2014. This was due  
10 to decreases in CNS tumours, retinoblastomas, and renal tumours.  
11 The proportion of cancers treated in paediatric cancer centres increased from 84%  
12 during 1985-1994 to 98% for 2005-2014 (Supplemental Table 2). The increase was  
13 largest for CNS tumours and epithelial neoplasms and melanomas; the proportion of  
14 CNS tumours treated in paediatric cancer centres increased from 71% in 1985-1994 to  
15 98% in 2005-2014.

16 During the decade 1985-1994, 1673 cancer cases were diagnosed at age 0-14 years;  
17 1880 cases were diagnosed in 1995-2004, and 1933 cases in 2005-2014 (Table 1). In all  
18 three decades, the most common cancers were leukaemias (31-34%), CNS tumours  
19 (19-23%), and lymphomas (11-12%) (Table 2). The overall annual age-standardised  
20 incidence rate per million children rose from 143 for 1985-1994 to 162 during 2005-  
21 2014 (Table 2, Figure 1). Age-standardised incidence in all three decades was highest  
22 for leukaemias, CNS tumours, and lymphomas, and the overall cumulative incidence  
23 before the age of 14 years rose from 2135 to 2423 per million children from 1985-1994  
24 to 2005-2014.



1 Childhood cancer was more common in boys than in girls, with a male to female ratio  
2 of 1.28 during 2005-2014 (Table 2). The male to female ratio was largest for Burkitt's  
3 lymphoma, 6.71, and smallest for thyroid carcinomas, 0.27 (Supplemental Table 1).  
4 Table 3 lists the age-specific incidences of childhood cancer over the period 2005-2014.  
5 Leukaemias and CNS tumours were among the most common cancers throughout all  
6 age group, neuroblastoma until 4 years, renal tumours from 1-4 years, and lymphoma  
7 from 5-14 years.

8 Overall, age-standardised childhood cancer incidence increased between 1985-2014 by  
9 0.7% per year (95% CI 0.5%-1.0%), though trends differed between age groups, type of  
10 cancer, and sex (Table 4, Figure 2). This increase was highest for children diagnosed  
11 between the ages of 10 and 14 years. The annual increase of 0.8% (95% CI 0.2%-1.4%)  
12 from 1985-2014 for the incidence of leukaemias was mainly driven by a 1.2% (95% CI  
13 0.4%-2.0%) increase among boys (Table 4). The incidence of CNS tumours increased  
14 annually by 3.0% (95% CI 1.3%-4.6%) from 1985-2002, but not thereafter (Table 4).  
15 Over the entire period, to 2014, the annual increase was 1.4% (95% CI 0.5%-2.4%) for  
16 boys and 1.7% (95% CI 0.7%-2.7%) for girls. Incidence of epithelial neoplasms and  
17 melanomas increased by 3.8% (95% CI 1.7%-6.0%) from 1985-2014, but because they  
18 account for only 3% of all cancer cases (165 of 5486 total cases) this had a very small  
19 effect on the overall trend (Tables 1 and 4).

## 1 **Discussion**

2 Overall childhood cancer incidence rates significantly increased between 1985-2014 in  
3 Switzerland, mainly driven by leukaemias and CNS tumours. The trend for CNS  
4 tumours plateaued in the 2000s, but continued for leukaemias and epithelial  
5 neoplasms and melanomas. The increase in overall incidence rates was age-  
6 dependent, with no increase in preschool children up to age 4, a slight increase in  
7 children 5-9 years old, and a stronger increase in young adolescents 10-14 years old.

## 8 **International comparison**

9 The proportion of microscopically verified cases in the SCCR is high (>93%), suggesting  
10 excellent validity of cancer diagnoses. This is comparable to validity ranging from 92-  
11 98% reported in other European countries,<sup>17,37,12,1,38,11</sup> and in Japan (90%),<sup>39</sup> the US  
12 (95%),<sup>32</sup> and Australia (97%).<sup>13</sup> Lower proportions of microscopically verified cases in  
13 certain tumours do not necessarily mean lower data quality, though. For  
14 retinoblastoma, current treatment rarely involves surgical removal of the eye, which  
15 has led to a decreasing proportion of microscopically verified cases from 41% for 1985-  
16 1994 to 14% during 2005-2014. Patients with low-grade gliomas and certain high-grade  
17 tumours are increasingly diagnosed with imaging techniques when surgical  
18 intervention puts them at high risk for functional loss; many of these patients do not  
19 undergo any surgery unless it becomes inevitable. The decreasing proportion of  
20 microscopically verified CNS tumours, from 92% during 1985-1994 to 82% during 2005-  
21 2014, reflects this.

22 Supplemental Table 3 compares the relative distribution of diagnostic groups and the  
23 overall age-standardised incidence of childhood cancer in Switzerland to the Piedmont  
24 region in Italy,<sup>11</sup> Spain,<sup>12</sup> Sweden,<sup>9</sup> France,<sup>37</sup> Germany,<sup>38</sup> Austria,<sup>17</sup> Western Europe

1 combined,<sup>1</sup> USA,<sup>40</sup> Canada,<sup>41</sup> Australia,<sup>13</sup> and Korea.<sup>14</sup> The relative distribution of  
2 diagnostic groups was similar to these countries, but age-standardized leukaemia  
3 incidence was among the highest, with higher values observed in only Sweden,  
4 Germany, and Australia. The incidence of neuroblastoma was among the lowest,  
5 excepting only Sweden and Australia.

6 Overall cancer incidence rates in Switzerland continuously rose over the whole study  
7 period, from 1985-2014. Overall incidence rates increased in all world regions except  
8 sub-Saharan Africa from the 1980s to 2001-2010,<sup>1</sup> but have remained stable in  
9 Austria,<sup>17</sup> Ireland,<sup>18</sup> the USA,<sup>19</sup> Canada,<sup>16</sup> and Australia<sup>13</sup> in more recent time periods  
10 (Supplemental Table 4). The increased incidence of childhood cancer observed in our  
11 study is mainly attributable to leukaemia and CNS tumours. Incidence of leukaemia  
12 increased steadily until 2014 without evidence of a plateau. Most countries also  
13 observed an increase,<sup>2,7-9,11-14,18,20</sup> while studies from the USA and Austria reported  
14 stable leukaemia incidence (Supplemental Table 4).<sup>17,19,32</sup> Leukaemia incidence in  
15 Canada first increased but levelled off after 1999.<sup>16</sup> We observed that incidence of CNS  
16 tumours increased until 2002 and plateaued thereafter, similar to Australia.<sup>13</sup> Many  
17 studies found increases over the entire study period,<sup>8,11,12,17,20</sup> others found no  
18 increase,<sup>14,16,19,32,35,42,43</sup> or even a decrease.<sup>35</sup> We also found that incidence of epithelial  
19 neoplasms and melanomas increased over the entire study period, similar to the  
20 USA,<sup>10,32</sup> Australia,<sup>13</sup> and Korea.<sup>14</sup>

## 21 **Possible reasons for increasing trend in incidence**

22 The increased incidence of childhood cancer may be attributable to several factors.  
23 First, improved case registration would increase the observed incidence. Patients with  
24 CNS tumours, with epithelial neoplasms and melanomas, and aged 10-14 years at time

1 of cancer diagnosis increasingly have been treated in paediatric oncology centres.  
2 These paediatric oncology centres collaborate closely with the SCCR and actively  
3 report every newly diagnosed child.<sup>24</sup> Since 1985, SCCR coverage has improved from  
4 85% to 95%.<sup>27</sup> The SCCR has retrospectively registered missed cases, but we cannot  
5 exclude that some of the children with CNS tumours or children treated in earlier  
6 decades in adult facilities escaped registration, and thus that earlier incidence of  
7 childhood cancers is underestimated. Advances in medical diagnostics also may have  
8 increased apparent incidence rates. Imaging techniques have enhanced the capacity to  
9 diagnose otherwise undetected low-grade CNS tumours since the mid-1980s.<sup>2,44</sup>  
10 Finally, medical and environmental risk factors could have increased the incidence of  
11 some cancers, including leukaemias in particular, which recently have increased in  
12 nearly all countries. Leukaemia and CNS tumours may be associated with exposure to  
13 low-level ionizing radiation,<sup>45</sup> which has likely increased in recent decades due to the  
14 increasing use of imaging techniques that rely upon ionizing radiation, especially  
15 computed tomography.<sup>46</sup> This might explain the age-dependent pattern of increase.  
16 Other potential risk factors include genetic causes, higher birth weight and parental  
17 age, increased infections, exposure to pesticides and traffic-related air pollution, as  
18 well as parental exposure to benzene.<sup>47-49</sup> However, the results of this study do not  
19 allow us to draw conclusions about specific risk factors that may have contributed to  
20 the overall increasing incidence of cancer in general, and specifically of leukaemia and  
21 CNS tumours.

## 22 **Strengths and limitations of the study**

23 The nationwide, population-based coverage of the SCCR with a high completeness of  
24 registration is a real strength of this study.<sup>27</sup> Data quality was high with more than 90%

1 of the cases having been microscopically verified. We could include recent diagnostic  
2 years (until 2014) due to the fast reporting and quality control procedures in the  
3 SCCR.<sup>21</sup> For the most recent years, the SCCR is in the process of exchanging data with  
4 the cantonal cancer registries. Therefore, we may have underestimated increases in  
5 incidence in the most recent period, although the SCCR missed very few cases in  
6 previous linkages. The sample size was limited by the comparatively small population  
7 of Switzerland, which led to wide confidence intervals for some diagnostic groups.  
8 Results should thus be interpreted cautiously because trends may reflect random  
9 fluctuations in incidence.

## 10 **Conclusions**

11 Changes in registration procedures and advances in medical diagnostics may explain  
12 the increase observed in the incidence in CNS tumours. For leukaemia, rising incidence  
13 may be real and due to changes in parental lifestyle, infections, pesticide exposure, air  
14 pollution, birth weight, or other risk factors. Future aetiological research should  
15 examine these long-term trends together with changes in medical and environmental  
16 risk factors.

## 1 **ACKNOWLEDGEMENTS**

2 We thank the clinical research coordinators of the Swiss Paediatric Oncology Group:

3 Dr. sc. nat. Claudia Althaus, Nadine Amport, Pamela Balestra, Nadine Beusch, Sarah

4 Blanc, Susann Drerup, Janine Garibay, Franziska Hochreutener, Monika Imbach,

5 Friedgard Julmy, Rachel Simone Kusche, Eléna Lemmel, Heike Markiewicz, Dr. med.

6 Veneranda Mattiello, Rodolfo Lo Piccolo, Annette Reinberg, Astrid Schiltknecht, Renate

7 Siegenthaler, Verena Stahel. We also thank the team of the Swiss Childhood Cancer

8 Registry: Meltem Altun, Erika Berclaz-Brantschen, Katharina Flandera, Elisabeth Kiraly.

9 We thank Christopher Ritter for his editorial suggestions and Ben Spycher for statistical  
10 advice.

11 This study was supported by the Swiss National Science Foundation (grant

12 PDFMP3\_141775), the Swiss Bridge Foundation ([www.swissbridge.ch](http://www.swissbridge.ch)), the Swiss

13 Cancer League (KLS-3412-02-2014, KLS-3886-02-2016), the Swiss Cancer Research

14 foundation (KFS-4157-02-2017), the Bernese Cancer League and Kinderkrebs Schweiz.

15 The work of the Swiss Childhood Cancer Registry is supported by the Swiss Paediatric

16 Oncology Group ([www.spog.ch](http://www.spog.ch)), Schweizerische Konferenz der kantonalen

17 Gesundheitsdirektorinnen und –direktoren ([www.gdk-cds.ch](http://www.gdk-cds.ch)), Swiss Cancer Research

18 ([www.krebsforschung.ch](http://www.krebsforschung.ch)), Kinderkrebshilfe Schweiz ([www.kinderkrebshilfe.ch](http://www.kinderkrebshilfe.ch)),

19 Bundesamt für Gesundheit, NICER and Celgene.

20

21

## 1 REFERENCES

- 2 1. Steliarova-Foucher E, Colombet M, Ries LAG, Moreno F, Dolya A, Bray F, Hesselting P, Shin HY,  
3 Stiller CA, contributors I-. International incidence of childhood cancer, 2001-10: a population-based  
4 registry study. *Lancet Oncol* 2017; 10.1016/S1470-2045(17)30186-9.
- 5 2. Kroll ME, Carpenter LM, Murphy MF, Stiller CA. Effects of changes in diagnosis and registration  
6 on time trends in recorded childhood cancer incidence in Great Britain. *Br J Cancer* 2012; 107: 1159-62.
- 7 3. Adamson P, Law G, Roman E. Assessment of trends in childhood cancer incidence. *Lancet* 2005;  
8 365: 753.
- 9 4. McNally RJ, Kelsey AM, Cairns DP, Taylor GM, Eden OB, Birch JM. Temporal increases in the  
10 incidence of childhood solid tumors seen in Northwest England (1954-1998) are likely to be real. *Cancer*  
11 2001; 92: 1967-76.
- 12 5. McNally RJ, Cairns DP, Eden OB, Kelsey AM, Taylor GM, Birch JM. Examination of temporal  
13 trends in the incidence of childhood leukaemias and lymphomas provides aetiological clues. *Leukemia*  
14 2001; 15: 1612-8.
- 15 6. Steliarova-Foucher E, Stiller C, Kaatsch P, Berrino F, Coebergh JW, Lacour B, Parkin M.  
16 Geographical patterns and time trends of cancer incidence and survival among children and adolescents  
17 in Europe since the 1970s (the ACCISproject): an epidemiological study. *Lancet* 2004; 364: 2097-105.
- 18 7. Kroll ME, Draper GJ, Stiller CA, Murphy MF. Childhood leukemia incidence in Britain, 1974-  
19 2000: time trends and possible relation to influenza epidemics. *J Natl Cancer Inst* 2006; 98: 417-20.
- 20 8. Spix C, Eletr D, Blettner M, Kaatsch P. Temporal trends in the incidence rate of childhood cancer  
21 in Germany 1987-2004. *Int J Cancer* 2008; 122: 1859-67.
- 22 9. Dreifaldt AC, Carlberg M, Hardell L. Increasing incidence rates of childhood malignant diseases  
23 in Sweden during the period 1960-1998. *Eur J Cancer* 2004; 40: 1351-60.
- 24 10. Ward EM, Thun MJ, Hannan LM, Jemal A. Interpreting cancer trends. *Ann N Y Acad Sci* 2006;  
25 1076: 29-53.
- 26 11. Isaevska E, Manasievska M, Alessi D, Mosso ML, Magnani C, Sacerdote C, Pastore G, Fagioli F,  
27 Merletti F, Maule M. Cancer incidence rates and trends among children and adolescents in Piedmont,  
28 1967-2011. *PLoS One* 2017; 12: e0181805.
- 29 12. Peris-Bonet R, Salmeron D, Martinez-Beneito MA, Galceran J, Marcos-Gragera R, Felipe S,  
30 Gonzalez V, Sanchez de Toledo Codina J. Childhood cancer incidence and survival in Spain. *Ann Oncol*  
31 2010; 21 Suppl 3: iii103-10.
- 32 13. Baade PD, Youlten DR, Valery PC, Hassall T, Ward L, Green AC, Aitken JF. Trends in incidence of  
33 childhood cancer in Australia, 1983-2006. *Br J Cancer* 2010; 102: 620-6.
- 34 14. Park HJ, Moon EK, Yoon JY, Oh CM, Jung KW, Park BK, Shin HY, Won YJ. Incidence and Survival  
35 of Childhood Cancer in Korea. *Cancer Res Treat* 2016; 10.4143/crt.2015.290.
- 36 15. Zheng R, Peng X, Zeng H, Zhang S, Chen T, Wang H, Chen W. Incidence, mortality and survival of  
37 childhood cancer in China during 2000-2010 period: A population-based study. *Cancer Lett* 2015; 363:  
38 176-80.
- 39 16. Mitra D, Shaw AK, Hutchings K. Trends in incidence of childhood cancer in Canada, 1992-2006.  
40 *Chronic Dis Inj Can* 2012; 32: 131-9.

- 1 17. Karim-Kos HE, Hackl M, Mann G, Urban C, Woehrer A, Slavc I, Ladenstein R. Trends in incidence,  
2 survival and mortality of childhood and adolescent cancer in Austria, 1994-2011. *Cancer Epidemiol* 2016;  
3 42: 72-81.
- 4 18. National Cancer Registry Ireland. *Cancer Trends*; 2014.
- 5 19. Siegel DA, King J, Tai E, Buchanan N, Ajani UA, Li J. Cancer incidence rates and trends among  
6 children and adolescents in the United States, 2001-2009. *Pediatrics* 2014; 134: e945-55.
- 7 20. Pesola F, Ferlay J, Sasieni P. Cancer incidence in English children, adolescents and young people:  
8 past trends and projections to 2030. *Br J Cancer* 2017; 117: 1865-73.
- 9 21. Pfeiffer V, Redmond S, Kuonen R, Sommer G, Spycher B, Schindler M, Singh P, Michel G, Kuehni  
10 C. Swiss Childhood Cancer Registry - Annual Report 2014/2015. Institute of Social and Preventive  
11 Medicine, University of Bern, Switzerland; 2015.
- 12 22. Michel G, von der Weid NX, Zwahlen M, Adam M, Rebholz CE, Kuehni CE, Swiss Childhood  
13 Cancer Registry, Swiss Paediatric Oncology Group. The Swiss Childhood Cancer Registry: rationale,  
14 organisation and results for the years 2001-2005. *Swiss Med Wkly* 2007; 137: 502-9.
- 15 23. Michel G, von der Weid NX, Zwahlen M, Redmond S, Strippoli MP, Kuehni CE, Swiss Paediatric  
16 Oncology Group. Incidence of childhood cancer in Switzerland: the Swiss Childhood Cancer Registry.  
17 *Pediatr Blood Cancer* 2008; 50: 46-51.
- 18 24. Adam M, von der Weid N, Michel G, Zwahlen M, Lutz JM, Probst-Hensch N, Niggli F, Kuehni C,  
19 Swiss Pediatric Oncology Group, Swiss Association of Cancer Registries. Access to specialized pediatric  
20 cancer care in Switzerland. *Pediatr Blood Cancer* 2010; 54: 721-7.
- 21 25. Steliarova-Foucher E, Stiller C, Lacour B, Kaatsch P. International Classification of Childhood  
22 Cancer, third edition. *Cancer* 2005; 103: 1457-67.
- 23 26. Jensen OM, Parkin DM, MacLennan R, Muir CS, Skeet RG. *Cancer Registration: Principles and*  
24 *Methods*. IARC Sci Publ 1991.
- 25 27. Schindler M, Mitter V, Bergstraesser E, Gumy-Pause F, Michel G, Kuehni CE. Death certificate  
26 notifications in the Swiss Childhood Cancer Registry: assessing completeness and registration  
27 procedures. *Swiss Med Wkly* 2015; 145: w14225.
- 28 28. Fritz A, Percy C, Jack A, Shanmugaratnam K, Sobin L, Parkin D, Whelan S. International  
29 Classification of Diseases for Oncology, third edition. Geneva, World Health Organisation; 2000.
- 30 29. World Health Organisation. International Statistical Classification of Diseases and Related  
31 Health Problems. - 10th Revision. Geneva; 1992.
- 32 30. Swiss Federal Statistical Office. Population and Households Statistics (STATPOP). 2016.  
33 <http://www.bfs.admin.ch/bfs/portal/de/index/news/02/03/01/01.html>.
- 34 31. European Union. Revision of the European Standard Population: Report of Eurostat's task force.  
35 Luxembourg; 2013.
- 36 32. Linabery AM, Ross JA. Trends in childhood cancer incidence in the U.S. (1992-2004). *Cancer*  
37 2008; 112: 416-32.
- 38 33. National Cancer Institute. Joinpoint Trend Analysis Software. 2016.  
39 <http://surveillance.cancer.gov/joinpoint/>.
- 40 34. Barrington-Trimis JL, Cockburn M, Metayer C, Gauderman WJ, Wiemels J, McKean-Cowdin R.  
41 Trends in childhood leukemia incidence over two decades from 1992 to 2013. *Int J Cancer* 2017; 140:  
42 1000-8.



- 1 35. Papathoma P, Thomopoulos TP, Karalexi MA, Ryzhov A, Zborovskaya A, Dimitrova N, Zivkovic S,  
2 Eser S, Antunes L, Sekerija M, Zagar T, Bastos J, Demetriou A, Cozma R, Coza D, Bouka E, Dessypris N,  
3 Kantzanou M, Kanavidis P, Dana H, Hatzipantelis E, Moschovi M, Polychronopoulou S, Pourtsidis A,  
4 Stiakaki E, Papakonstantinou E, Oikonomou K, Sgouros S, Vakis A, Zountsas B, Bourgioti C, Kelekis N,  
5 Prassopoulos P, Choreftaki T, Papadopoulos S, Stefanaki K, Strantzia K, Cardis E, Steliarova-Foucher E,  
6 Petridou ET. Childhood central nervous system tumours: Incidence and time trends in 13 Southern and  
7 Eastern European cancer registries. *Eur J Cancer* 2015; 51: 1444-55.
- 8 36. Stekhoven DJ, Buhlmann P. MissForest--non-parametric missing value imputation for mixed-  
9 type data. *Bioinformatics* 2012; 28: 112-8.
- 10 37. Lacour B, Guyot-Goubin A, Guissou S, Bellec S, Desandes E, Clavel J. Incidence of childhood  
11 cancer in France: National Children Cancer Registries, 2000-2004. *Eur J Cancer Prev* 2010; 19: 173-81.
- 12 38. Kaatsch P, Spix C. German Childhood Cancer Registry - Report 2013/14 (1980-2013). Institute of  
13 Medical Biostatistics, Epidemiology and Informatics (IMBEI) at the University Medical Center of the  
14 Johannes Gutenberg University Mainz, Germany; 2014.
- 15 39. Katanoda K, Shibata A, Matsuda T, Hori M, Nakata K, Narita Y, Ogawa C, Munakata W, Kawai A,  
16 Nishimoto H. Childhood, adolescent and young adult cancer incidence in Japan in 2009-2011. *Jpn J Clin*  
17 *Oncol* 2017; 10.1093/jjco/hyx070: 1-10.
- 18 40. United States Department of Health and Human Services CfDcPaNCI. United States Cancer  
19 Statistics: 1999 - 2013 Incidence, WONDER Online Database. 2016.
- 20 41. Ellison L, Janz T. Childhood cancer incidence and mortality in Canada: Statistics Canada; 2015.
- 21 42. Schmidt LS, Schmiegelow K, Lahteenmaki P, Trager C, Stokland T, Grell K, Gustafson G, Sehested  
22 A, Raashou-Nielsen O, Johansen C, Schuz J. Incidence of childhood central nervous system tumors in the  
23 Nordic countries. *Pediatr Blood Cancer* 2011; 56: 65-9.
- 24 43. Fairley L, Picton SV, McNally RJ, Bailey S, McCabe MG, Feltbower RG. Incidence and survival of  
25 children and young people with central nervous system embryonal tumours in the North of England,  
26 1990-2013. *Eur J Cancer* 2016; 61: 36-43.
- 27 44. Smith MA, Freidlin B, Ries LA, Simon R. Trends in reported incidence of primary malignant brain  
28 tumors in children in the United States. *J Natl Cancer Inst* 1998; 90: 1269-77.
- 29 45. Spycher BD, Lupatsch JE, Zwahlen M, Roosli M, Niggli F, Grotzer MA, Rischewski J, Egger M,  
30 Kuehni CE, Swiss Pediatric Oncology G, Swiss National Cohort Study G. Background ionizing radiation and  
31 the risk of childhood cancer: a census-based nationwide cohort study. *Environ Health Perspect* 2015;  
32 123: 622-8.
- 33 46. Miglioretti DL, Johnson E, Williams A, Greenlee RT, Weinmann S, Solberg LI, Feigelson HS,  
34 Roblin D, Flynn MJ, Vanneman N, Smith-Bindman R. The Use of Computed Tomography in Pediatrics and  
35 the Associated Radiation Exposure and Estimated Cancer Risk. *Jama Pediatrics* 2013; 167: 700-7.
- 36 47. Spector LG, Pankratz N, Marcotte EL. Genetic and nongenetic risk factors for childhood cancer.  
37 *Pediatr Clin North Am* 2015; 62: 11-25.
- 38 48. Spycher BD, Feller M, Roosli M, Ammann RA, Diezi M, Egger M, Kuehni CE. Childhood cancer  
39 and residential exposure to highways: a nationwide cohort study. *Eur J Epidemiol* 2015; 30: 1263-75.
- 40 49. Spycher BD, Lupatsch JE, Huss A, Rischewski J, Schindera C, Spoerri A, Vermeulen R, Kuehni CE.  
41 Parental occupational exposure to benzene and the risk of childhood cancer: A census-based cohort  
42 study. *Environ Int* 2017; 108: 84-91.
- 43

**Table 1.** Numbers of incident cancers and proportions of microscopically verified cancers among all children diagnosed with cancer in Switzerland at age 0-14 years from 1985-2014, by diagnostic period

|                                      | 1985-1994 |                                       |      |            | 1995-2004 |                                       |      |            | 2005-2014 |                                       |      |            | p-value <sup>b</sup> |
|--------------------------------------|-----------|---------------------------------------|------|------------|-----------|---------------------------------------|------|------------|-----------|---------------------------------------|------|------------|----------------------|
|                                      | All cases | Microscopically verified <sup>a</sup> | %    | 95% CI     | All cases | Microscopically verified <sup>a</sup> | %    | 95% CI     | All cases | Microscopically verified <sup>a</sup> | %    | 95% CI     |                      |
| <i>All cancers (N=5486)</i>          | 1673      | 1539                                  | 92.0 | 90.7; 93.3 | 1880      | 1769                                  | 94.1 | 93.0; 95.2 | 1933      | 1796                                  | 92.9 | 91.8; 94.1 | 0.047                |
| <i>Age at diagnosis</i>              |           |                                       |      |            |           |                                       |      |            |           |                                       |      |            |                      |
| 0-4 years                            | 804       | 727                                   | 90.4 | 88.4; 92.5 | 825       | 754                                   | 91.4 | 89.5; 93.3 | 830       | 755                                   | 91.0 | 89.0; 92.9 | 0.792                |
| 5-9 years                            | 444       | 410                                   | 92.3 | 89.9; 94.8 | 498       | 475                                   | 95.4 | 93.5; 97.2 | 509       | 472                                   | 92.7 | 90.5; 95.0 | 0.112                |
| 10-14 years                          | 425       | 402                                   | 94.6 | 92.4; 96.7 | 557       | 540                                   | 96.9 | 95.5; 98.4 | 594       | 569                                   | 95.8 | 94.2; 97.4 | 0.182                |
| <i>ICCC-3 Main diagnostic group</i>  |           |                                       |      |            |           |                                       |      |            |           |                                       |      |            |                      |
| I. Leukaemias                        | 569       | 561                                   | 98.6 | 97.6; 99.6 | 581       | 581                                   | 100  |            | 647       | 647                                   | 100  |            | <0.001               |
| II. Lymphomas                        | 201       | 200                                   | 99.5 | 98.5; 99.9 | 225       | 225                                   | 100  |            | 214       | 213                                   | 99.5 | 98.6; 99.9 | 0.580                |
| III. CNS tumours                     | 328       | 275                                   | 83.8 | 79.9; 87.8 | 429       | 376                                   | 87.6 | 84.5; 90.8 | 448       | 364                                   | 81.3 | 77.6; 84.9 | 0.033                |
| IV. Neuroblastoma                    | 134       | 117                                   | 87.3 | 81.7; 92.9 | 115       | 106                                   | 92.2 | 87.3; 97.1 | 119       | 112                                   | 94.1 | 89.9; 98.3 | 0.147                |
| V. Retinoblastoma                    | 46        | 19                                    | 41.3 | 27.1; 55.5 | 53        | 17                                    | 32.1 | 19.5; 44.6 | 42        | 6                                     | 14.3 | 3.7; 24.9  | 0.020                |
| VI. Renal tumours                    | 102       | 99                                    | 97.1 | 93.8; 99.9 | 98        | 97                                    | 99.0 | 97.0; 99.9 | 98        | 92                                    | 93.9 | 89.1; 98.6 | 0.135                |
| VII. Hepatic tumours                 | 18        | 12                                    | 66.7 | 44.9; 88.4 | 27        | 27                                    | 100  |            | 16        | 15                                    | 94   | 81.9; 99.9 | 0.002                |
| VIII. Bone tumours                   | 73        | 71                                    | 97   | 93.5; 99.9 | 95        | 95                                    | 100  |            | 79        | 79                                    | 100  |            | 0.091                |
| IX. Soft tissue sarcomas             | 111       | 110                                   | 99   | 97.3; 99.9 | 129       | 128                                   | 99.2 | 97.7; 99.9 | 139       | 139                                   | 100  |            | 0.555                |
| X. Germ cell tumours                 | 45        | 42                                    | 93.3 | 86.0; 99.9 | 53        | 52                                    | 98.1 | 94.5; 99.9 | 57        | 56                                    | 98.2 | 94.8; 99.9 | 0.303                |
| XI. Epithelial neoplasms & melanomas | 31        | 29                                    | 93.5 | 84.9; 99.9 | 65        | 63                                    | 96.9 | 92.7; 99.9 | 69        | 69                                    | 100  |            | 0.140                |
| XII. Other malignant neoplasms       | 15        | 4                                     | 26.7 | 4.3; 49.0  | 10        | 2                                     | 20.0 | 0.0; 44.8  | 5         | 4                                     | 80   | 44.9; 99.9 | 0.055                |

**Abbreviations:** CI, confidence interval; CNS, central nervous system; ICCC-3, International Classification of Childhood Cancer, third edition.

<sup>a</sup>Includes histology of primary tumours and metastasis, and cytology; <sup>b</sup>p-value derived from Kruskal-Wallis rank sum test for trend, comparing the numbers of microscopically verified cases between the three time periods.

**Table 2.** Incidence of childhood cancer in Switzerland at age 0-14 years from 1985-2014, by diagnostic group and period

| 1985-1994                            |                                  |                                                       |                                                 |                           |                          |
|--------------------------------------|----------------------------------|-------------------------------------------------------|-------------------------------------------------|---------------------------|--------------------------|
|                                      | Average number of cases/year (%) | ASR per million population/year (95% CI) <sup>a</sup> | CR per million population (95% CI) <sup>b</sup> | 1:N children <sup>c</sup> | Male/Female <sup>d</sup> |
| <i>All cancers</i>                   | 166.6 (100)                      | 143.1 (136.2; 150.0)                                  | 2135.3 (2108.8; 2161.8)                         | 468                       | 1.24                     |
| <i>ICCC-3 Main diagnostic group</i>  |                                  |                                                       |                                                 |                           |                          |
| I. Leukaemias                        | 56.9 (34.2)                      | 48.8 (44.8; 52.8)                                     | 730.3 (714.8; 745.8)                            | 1369                      | 1.29                     |
| II. Lymphomas                        | 20.1 (12.1)                      | 17.3 (14.9; 19.7)                                     | 259.2 (249.9; 268.4)                            | 3858                      | 2.14                     |
| III. CNS tumours                     | 32.4 (19.4)                      | 27.8 (24.8; 30.8)                                     | 417.1 (405.4; 428.8)                            | 2398                      | 1.17                     |
| IV. Neuroblastoma                    | 13.4 (8.0)                       | 11.5 (9.6; 13.5)                                      | 168.9 (161.4; 176.3)                            | 5921                      | 1.27                     |
| V. Retinoblastoma                    | 4.6 (2.8)                        | 4.0 (2.8; 5.1)                                        | 58.0 (53.6; 62.4)                               | 17241                     | 0.84                     |
| VI. Renal tumours                    | 10.2 (6.1)                       | 8.8 (7.1; 10.5)                                       | 129.8 (123.3; 136.4)                            | 7704                      | 0.76                     |
| VII. Hepatic tumours                 | 1.8 (1.1)                        | 1.6 (0.8; 2.3)                                        | 22.9 (20.1; 25.6)                               | 43668                     | 1.25                     |
| VIII. Bone tumours                   | 7.3 (4.4)                        | 6.3 (4.8; 7.7)                                        | 94.3 (88.7; 99.9)                               | 10604                     | 1.03                     |
| IX. Soft tissue sarcomas             | 10.9 (6.5)                       | 9.4 (7.6; 11.1)                                       | 139.6 (132.8; 146.3)                            | 7163                      | 1.06                     |
| X. Germ cell tumours                 | 4.4 (2.6)                        | 3.8 (2.7; 4.9)                                        | 56.4 (52.1; 60.7)                               | 17730                     | 1.10                     |
| XI. Epithelial neoplasms & melanomas | 3.1 (1.9)                        | 2.7 (1.7; 3.6)                                        | 39.9 (36.3; 43.5)                               | 25063                     | 1.07                     |
| XII. Other malignant neoplasms       | 1.5 (0.9)                        | 1.3 (0.6; 1.9)                                        | 19.1 (16.6; 21.6)                               | 52356                     | 0.88                     |
| 1995-2004                            |                                  |                                                       |                                                 |                           |                          |
|                                      | Average number of cases/year (%) | ASR per million population/year (95% CI) <sup>a</sup> | CR per million population (95% CI) <sup>b</sup> | 1:N children <sup>c</sup> | Male/Female <sup>d</sup> |
| <i>All cancers</i>                   | 187.5 (100)                      | 153.8 (146.8; 160.8)                                  | 2298.9 (2272.2; 2325.6)                         | 435                       | 1.27                     |
| <i>ICCC-3 Main diagnostic group</i>  |                                  |                                                       |                                                 |                           |                          |
| I. Leukaemias                        | 57.8 (30.8)                      | 47.4 (43.6; 51.3)                                     | 710.3 (695.4; 725.1)                            | 1408                      | 1.40                     |
| II. Lymphomas                        | 22.5 (12.0)                      | 18.1 (15.7; 20.4)                                     | 270.6 (261.4; 279.7)                            | 3695                      | 1.81                     |
| III. CNS tumours                     | 42.9 (22.9)                      | 34.8 (31.5; 38.1)                                     | 523.4 (510.6; 536.1)                            | 1911                      | 1.25                     |
| IV. Neuroblastoma                    | 11.3 (6.0)                       | 9.9 (8.0; 11.7)                                       | 144.6 (137.9; 151.3)                            | 6916                      | 0.92                     |
| V. Retinoblastoma                    | 5.3 (2.8)                        | 4.7 (3.4; 5.9)                                        | 68.4 (63.7; 73.0)                               | 14620                     | 0.96                     |
| VI. Renal tumours                    | 9.8 (5.2)                        | 8.2 (6.6; 9.9)                                        | 122.5 (116.3; 128.6)                            | 8163                      | 1.00                     |
| VII. Hepatic tumours                 | 2.7 (1.4)                        | 2.3 (1.4; 3.2)                                        | 33.9 (30.6; 37.1)                               | 29499                     | 3.50                     |
| VIII. Bone tumours                   | 9.5 (5.1)                        | 7.5 (6.0; 9.0)                                        | 112.8 (106.9; 118.7)                            | 8865                      | 0.94                     |
| IX. Soft tissue sarcomas             | 12.9 (6.9)                       | 10.6 (8.7; 12.4)                                      | 157.7 (150.7; 164.7)                            | 6341                      | 1.48                     |
| X. Germ cell tumours                 | 5.3 (2.8)                        | 4.4 (3.2; 5.5)                                        | 65.1 (60.6; 69.5)                               | 15361                     | 0.77                     |
| XI. Epithelial neoplasms & melanomas | 6.5 (3.5)                        | 5.2 (3.9; 6.4)                                        | 77.5 (72.5; 82.4)                               | 12903                     | 0.81                     |
| XII. Other malignant neoplasms       | 1.0 (0.5)                        | 0.8 (0.3; 1.4)                                        | 12.3 (10.4; 14.3)                               | 81301                     | 1.00                     |
| 2005-2014                            |                                  |                                                       |                                                 |                           |                          |
|                                      | Average number of cases/year (%) | ASR per million population/year (95% CI) <sup>a</sup> | CR per million population (95% CI) <sup>b</sup> | 1:N children <sup>c</sup> | Male/Female <sup>d</sup> |
| <i>All cancers</i>                   | 192.4 (100)                      | 162.3 (155.0; 169.5)                                  | 2423.4 (2395.5; 2451.2)                         | 413                       | 1.28                     |
| <i>ICCC-3 Main diagnostic group</i>  |                                  |                                                       |                                                 |                           |                          |
| I. Leukaemias                        | 64.3 (33.4)                      | 54.5 (50.3; 58.8)                                     | 816.0 (799.8; 832.2)                            | 1225                      | 1.57                     |
| II. Lymphomas                        | 21.3 (11.1)                      | 17.5 (15.2; 19.9)                                     | 262.4 (253.2; 271.5)                            | 3811                      | 1.77                     |
| III. CNS tumours                     | 44.5 (23.1)                      | 37.3 (33.9; 40.8)                                     | 560.7 (547.3; 574.1)                            | 1783                      | 1.17                     |
| IV. Neuroblastoma                    | 11.9 (6.2)                       | 10.5 (8.6; 12.3)                                      | 153.0 (146.0; 160.0)                            | 6536                      | 1.13                     |
| V. Retinoblastoma                    | 4.2 (2.2)                        | 3.7 (2.6; 4.8)                                        | 54.1 (49.9; 58.3)                               | 18484                     | 0.83                     |
| VI. Renal tumours                    | 9.7 (5.0)                        | 8.4 (6.7; 10.0)                                       | 124.4 (118.1; 130.7)                            | 8039                      | 0.80                     |
| VII. Hepatic tumours                 | 1.6 (0.8)                        | 1.4 (0.7; 2.1)                                        | 20.4 (17.9; 23.0)                               | 49020                     | 1.67                     |
| VIII. Bone tumours                   | 7.9 (4.1)                        | 6.5 (5.0; 7.9)                                        | 97.1 (91.5; 102.7)                              | 10299                     | 0.88                     |
| IX. Soft tissue sarcomas             | 13.9 (7.2)                       | 11.6 (9.7; 13.6)                                      | 173.9 (166.5; 181.4)                            | 5750                      | 1.36                     |
| X. Germ cell tumours                 | 5.7 (3.0)                        | 4.8 (3.6; 6.1)                                        | 71.0 (66.2; 75.8)                               | 14085                     | 1.19                     |
| XI. Epithelial neoplasms & melanomas | 6.9 (3.6)                        | 5.6 (4.3; 7.0)                                        | 84.0 (78.8; 89.2)                               | 11905                     | 0.60                     |
| XII. Other malignant neoplasms       | 0.5 (0.3)                        | 0.4 (0.1; 0.8)                                        | 6.3 (4.9; 7.7)                                  | 158730                    | 1.50                     |

**Abbreviations:** ASR, age-standardised incidence rate; CI, confidence interval; CNS, central nervous system; CR, cumulative incidence rate; ICCC-3, International Classification of Childhood Cancer, third edition.

<sup>a</sup>Standardised according to the 2010 European standard population; <sup>b</sup>Cumulative incidence up to the age of 14 years; <sup>c</sup>Number of children affected up to the age of 14 years in Switzerland; <sup>d</sup>male:female ratio

**Table 3.** Age-specific incidence rate per million population in Switzerland and average cases per year from 2005-2014, by age at diagnosis and diagnostic group

|                                      | Age-specific incidence rate (95% CI) |                      |                      |                      | Average cases per year per million population |           |           |             |
|--------------------------------------|--------------------------------------|----------------------|----------------------|----------------------|-----------------------------------------------|-----------|-----------|-------------|
|                                      | <1 year                              | 1-4 years            | 5-9 years            | 10-14 years          | <1 year                                       | 1-4 years | 5-9 years | 10-14 years |
| <i>All cancers</i>                   | 228.3 (195.9; 264.6)                 | 209.5 (193.7; 226.3) | 129.7 (118.6; 141.5) | 142.0 (130.8; 154.0) | 11.8                                          | 43.4      | 33.7      | 39.4        |
| <i>ICCC-3 Main diagnostic group</i>  |                                      |                      |                      |                      |                                               |           |           |             |
| I. Leukaemias                        | 36.1 (24.0; 52.2)                    | 99.1 (88.4; 110.8)   | 43.9 (37.6; 51.0)    | 32.7 (27.4; 38.7)    | 1.9                                           | 20.5      | 11.4      | 9.1         |
| II. Lymphomas                        | 3.9 (0.8; 11.3)                      | 9.7 (6.5; 13.8)      | 14.9 (11.3; 19.3)    | 29.3 (24.4; 35.0)    | 0.2                                           | 2.0       | 3.9       | 8.1         |
| III. CNS tumours                     | 36.1 (24.0; 52.2)                    | 38.3 (31.7; 45.8)    | 40.6 (34.5; 47.4)    | 33.6 (28.3; 39.7)    | 1.9                                           | 7.9       | 10.5      | 9.3         |
| IV. Neuroblastoma                    | 65.8 (49.0; 86.5)                    | 18.7 (14.2; 24.1)    | 1.5 (0.6; 3.4)       | 1.0 (0.3; 2.5)       | 3.4                                           | 3.9       | 0.4       | 0.3         |
| V. Retinoblastoma                    | 25.8 (15.8; 39.8)                    | 6.4 (3.9; 9.9)       | 0.5 (0.1; 1.9)       | 0.0 (0.0; 0.7)       | 1.3                                           | 1.3       | 0.1       | 0.0         |
| VI. Renal tumours                    | 18.1 (9.9; 30.3)                     | 16.7 (12.5; 21.9)    | 6.4 (4.2; 9.5)       | 1.4 (0.5; 3.1)       | 0.9                                           | 3.5       | 1.7       | 0.4         |
| VII. Hepatic tumours                 | 7.7 (2.8; 16.8)                      | 2.3 (0.9; 4.6)       | 0.5 (0.1; 1.9)       | 0.2 (0.0; 1.3)       | 0.4                                           | 0.5       | 0.1       | 0.1         |
| VIII. Bone tumours                   | 0.0 (0.0; 3.9)                       | 1.6 (0.5; 3.8)       | 5.6 (3.5; 8.6)       | 12.5 (9.3; 16.4)     | 0.0                                           | 0.3       | 1.5       | 3.5         |
| IX. Soft tissue sarcomas             | 11.6 (5.3; 22.0)                     | 12.6 (8.9; 17.2)     | 9.2 (6.5; 12.8)      | 13.2 (10.0; 17.2)    | 0.6                                           | 2.6       | 2.4       | 3.7         |
| X. Germ cell tumours                 | 19.4 (10.8; 31.9)                    | 3.5 (1.8; 6.3)       | 1.8 (0.7; 3.7)       | 5.8 (3.7; 8.6)       | 1.0                                           | 0.7       | 0.5       | 1.6         |
| XI. Epithelial neoplasms & melanomas | 1.3 (0.0; 7.2)                       | 0.3 (0.0; 1.8)       | 4.4 (2.5; 7.0)       | 12.0 (8.9; 15.8)     | 0.1                                           | 0.1       | 1.1       | 3.3         |
| XII. Other malignant neoplasms       | 2.6 (0.3; 9.3)                       | 0.3 (0.0; 1.8)       | 0.3 (0.0; 1.4)       | 0.2 (0.0; 1.3)       | 0.1                                           | 0.1       | 0.1       | 0.1         |

**Abbreviations:** CI, confidence interval; CNS, central nervous system; ICCC-3, International Classification of Childhood Cancer, third edition.

**Table 4.** Average annual percentage change (AAPC) in incidence rates of childhood cancer by diagnostic group, age and sex in Switzerland 1985-2014: Results from JoinPoint regression.

| Diagnostic group                     | Trend 1   |                         | Trend 2   |                  |
|--------------------------------------|-----------|-------------------------|-----------|------------------|
|                                      | Period    | AAPC (95% CI)           | Period    | AAPC (95% CI)    |
| <i>All cancers</i>                   | 1985-2014 | <b>0.7 (0.5; 1.0)</b>   |           |                  |
| 0-4 years                            | 1985-2014 | 0.3 (-0.1; 0.7)         |           |                  |
| 5-9 years                            | 1985-2014 | <b>0.8 (0.2; 1.3)</b>   |           |                  |
| 10-14 years                          | 1985-2014 | <b>1.4 (0.9; 2.0)</b>   |           |                  |
| I. Leukaemias                        | 1985-2009 | <b>0.8 (0.2; 1.4)</b>   |           |                  |
| II. Lymphomas                        | 1985-2014 | 0.0 (-0.9; 1.0)         |           |                  |
| III. CNS tumours                     | 1985-2002 | <b>3.0 (1.3; 4.6)</b>   | 2002-2014 | -0.2 (-2.4; 2.1) |
| IV. Neuroblastoma                    | 1985-2014 | -0.5 (-1.7; 0.7)        |           |                  |
| V. Retinoblastoma                    | 1985-2014 | <b>-0.9 (-3.0; 1.2)</b> |           |                  |
| VI. Renal tumours                    | 1985-2014 | -0.3 (-1.5; 0.9)        |           |                  |
| VII. Hepatic tumours                 | 1985-2014 | n.a.                    |           |                  |
| VIII. Bone tumours                   | 1985-2014 | 0.2 (-0.9; 1.4)         |           |                  |
| IX. Soft tissue sarcomas             | 1985-2014 | 1.0 (-0.4; 2.5)         |           |                  |
| X. Germ cell tumours                 | 1985-2014 | 1.6 (-0.2; 3.4)         |           |                  |
| XI. Epithelial neoplasms & melanomas | 1985-2014 | <b>3.8 (1.7; 6.0)</b>   |           |                  |
| XII. Other malignant neoplasms       | 1985-2014 | n.a.                    |           |                  |
| <i>Boys</i>                          |           |                         |           |                  |
| All cases                            | 1985-2014 | <b>0.8 (0.5; 1.2)</b>   |           |                  |
| I. Leukaemias                        | 1985-2010 | <b>1.2 (0.4; 2.0)</b>   |           |                  |
| II. Lymphomas                        | 1985-2014 | 0.0 (-1.1; 1.0)         |           |                  |
| III. CNS tumours                     | 1985-2014 | <b>1.4 (0.5; 2.4)</b>   |           |                  |
| IV. Neuroblastoma                    | 1985-2014 | -1.1 (-2.3; 0.1)        |           |                  |
| V. Retinoblastoma                    | 1985-2014 | n.a.                    |           |                  |
| VI. Renal tumours                    | 1985-2014 | 0.1 (-1.9; 2.1)         |           |                  |
| VII. Hepatic tumours                 | 1985-2014 | n.a.                    |           |                  |
| VIII. Bone tumours                   | 1985-2014 | n.a.                    |           |                  |
| IX. Soft tissue sarcomas             | 1985-2014 | 0.7 (-0.8; 2.2)         |           |                  |
| X. Germ cell tumours                 | 1985-2014 | n.a.                    |           |                  |
| XI. Epithelial neoplasms & melanomas | 1985-2014 | n.a.                    |           |                  |
| XII. Other malignant neoplasms       | 1985-2014 | n.a.                    |           |                  |
| <i>Girls</i>                         |           |                         |           |                  |
| All cases                            | 1985-2014 | <b>0.6 (0.2; 1.0)</b>   |           |                  |
| I. Leukaemias                        | 1985-2014 | 0.2 (-0.6; 0.9)         |           |                  |
| II. Lymphomas                        | 1985-2014 | 0.1 (-1.8; 2.0)         |           |                  |
| III. CNS tumours                     | 1985-2014 | <b>1.7 (0.7; 2.7)</b>   |           |                  |
| IV. Neuroblastoma                    | 1985-2014 | 0.6 (-1.3; 2.6)         |           |                  |
| V. Retinoblastoma                    | 1985-2014 | n.a.                    |           |                  |
| VI. Renal tumours                    | 1985-2014 | -0.7 (-2.4; 1.1)        |           |                  |
| VII. Hepatic tumours                 | 1985-2014 | n.a.                    |           |                  |
| VIII. Bone tumours                   | 1985-2014 | 0.7 (-0.9; 2.5)         |           |                  |
| IX. Soft tissue sarcomas             | 1985-2014 | n.a.                    |           |                  |
| X. Germ cell tumours                 | 1985-2014 | n.a.                    |           |                  |
| XI. Epithelial neoplasms & melanomas | 1985-2014 | n.a.                    |           |                  |
| XII. Other malignant neoplasms       | 1985-2014 | n.a.                    |           |                  |

**Abbreviations:** AAPC, average annual percentage change; CI, confidence interval; CNS, central nervous system; n.a., not applicable.

Bold letters indicate AAPCs with p-values < 0.05.

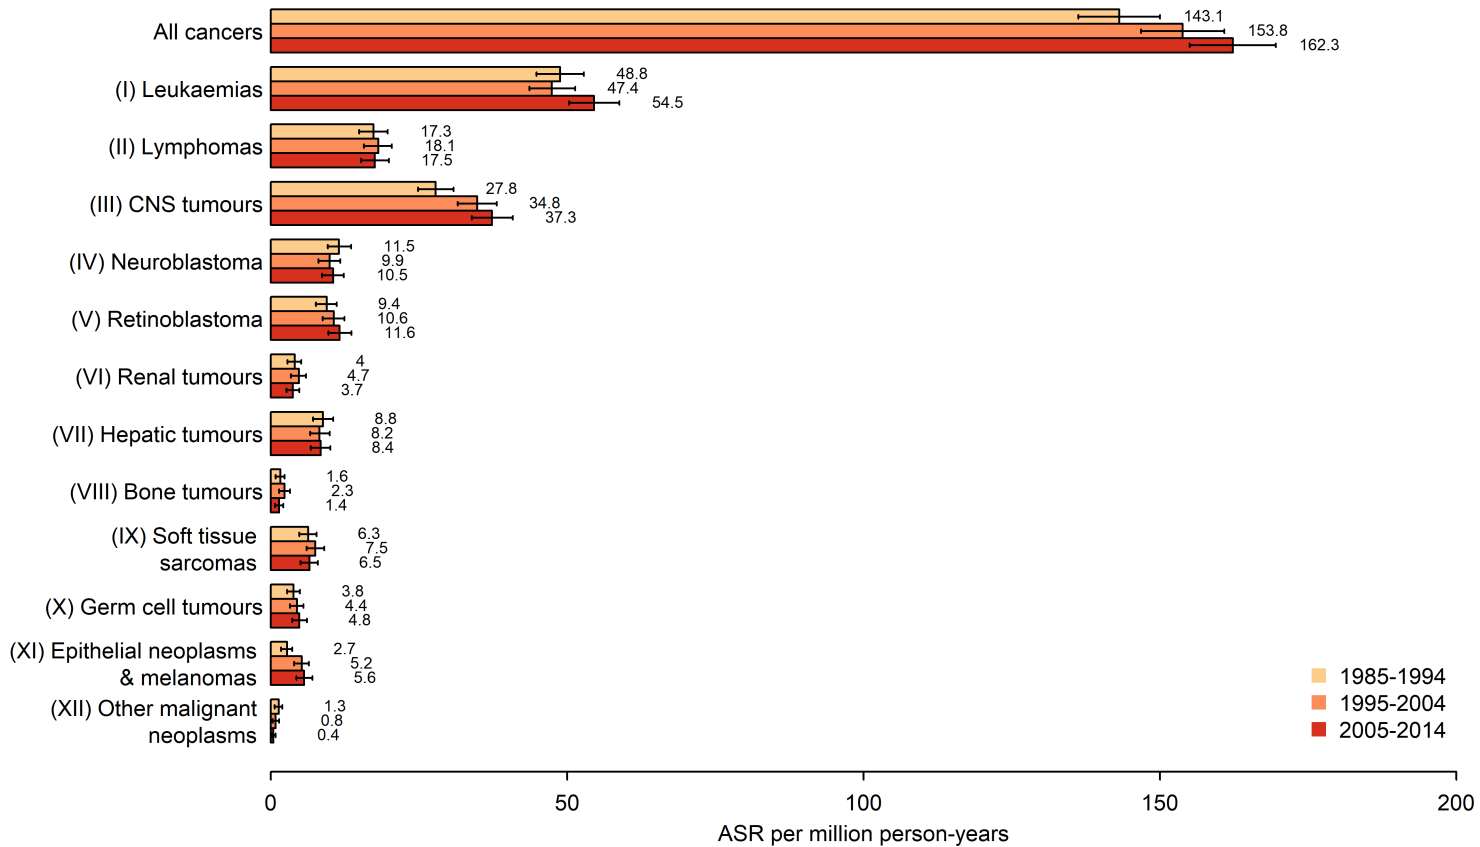

### A) All cancer diagnoses

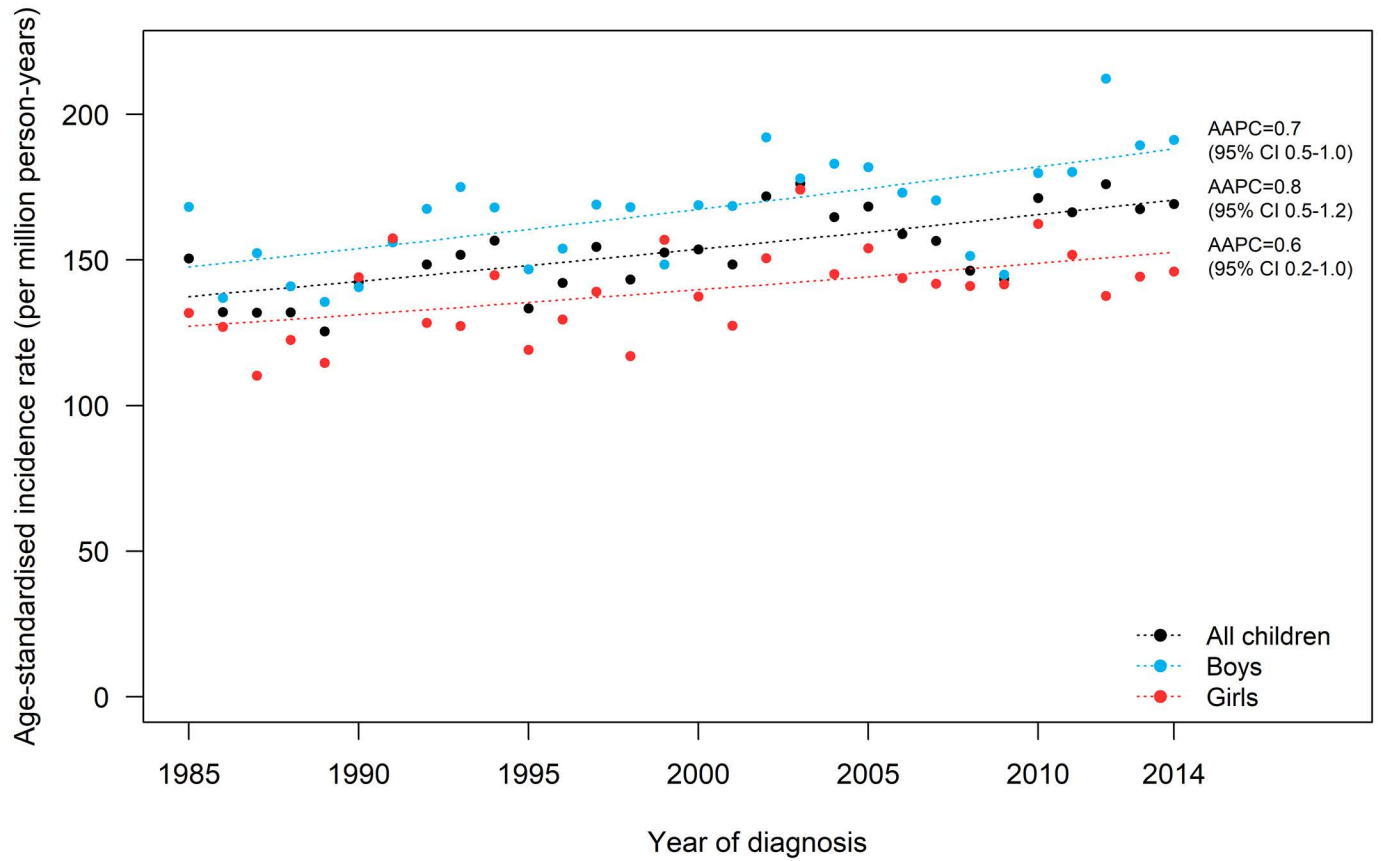

### B) Leukaemias

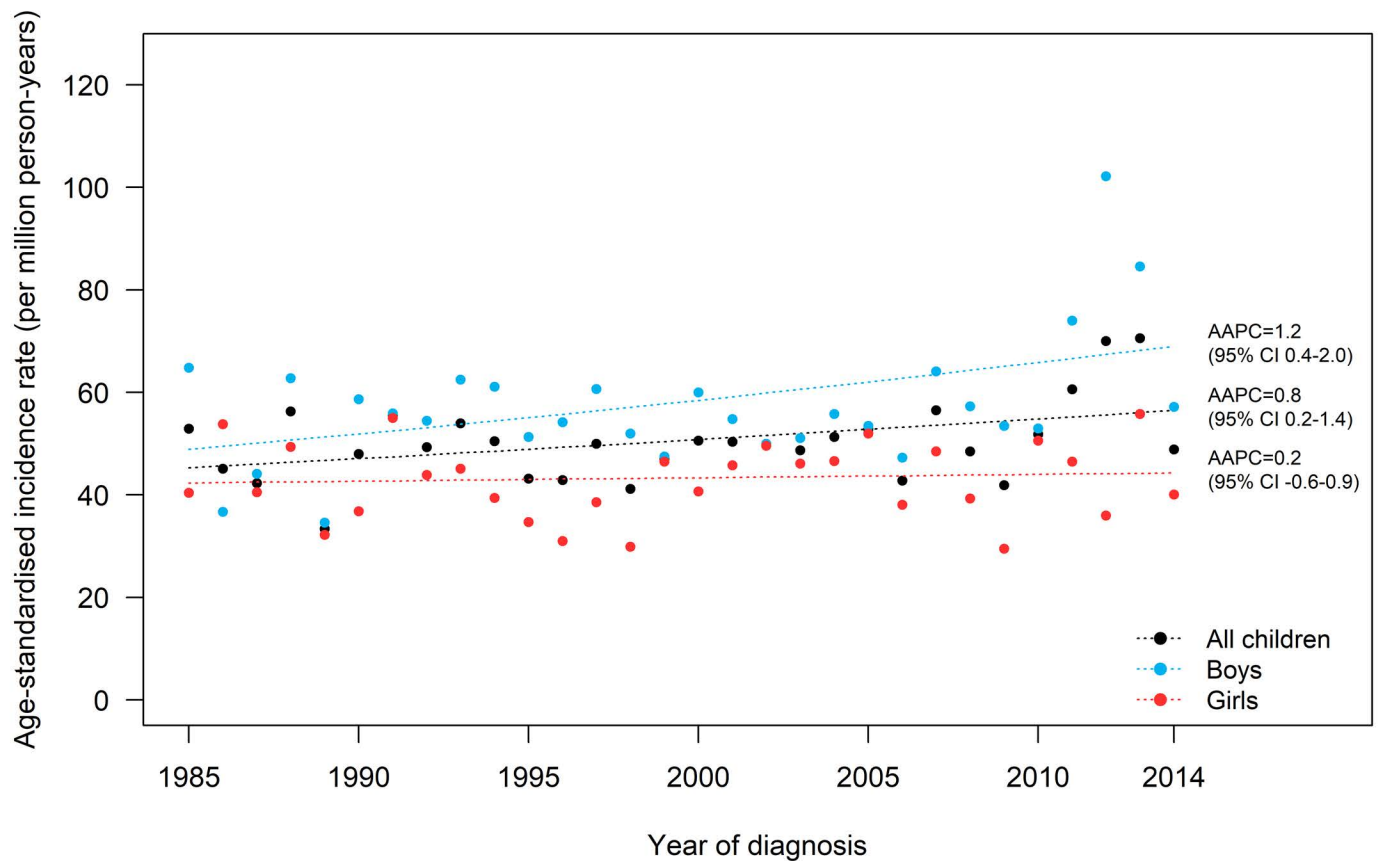

## Figure legends

**Figure 1.** Comparison of incidence of childhood cancer between 1985-1994, 1995-2004 and 2005-2014, by cancer diagnosis.

Abbreviations: ASR, Age-standardized incidence rate.

Cancer diagnoses were classified according to the International Classification of Childhood Cancer, third edition (ICCC-3). Incidence rates were age-standardized according to the 2010 European standard population. Error bars show 95% confidence intervals.

**Figure 2.** Trends in incidence rates (per million person-years) in Switzerland between 1985 and 2014, standardized according to the 2010 European standard population, for A) all childhood cancer diagnoses combined and B) leukaemias. Trends were modelled using Joinpoint regression.

Abbreviations: AAPC, average annual percentage change; CI, confidence interval.
